# Supplementary material for: A Cost-Effectiveness Analysis of a Program to Control Rheumatic Fever and Rheumatic Heart Disease in Pinar del Rio, Cuba
Source: PubMed Central journal article supplement (PMC4358951; doi:10.1371/journal.pone.0121363), 2015-03-13
Supplement: pone.0121363.s004.pdf [file pone.0121363.s004.pdf]

**S3 Table. Medical costs (2010 USD) calculated from data collection sheets by Lopez (2000) and Nordet et al. (2008).**

**PRIMARY PREVENTION COSTS**

see cost sheet part 2

|                    | 1986   | 1996   |                                                            |
|--------------------|--------|--------|------------------------------------------------------------|
| strep cases        | 17940  | 15945  |                                                            |
| PHC cost, USD 2000 | 20     | 20     |                                                            |
| PCN cost, USD 2000 | 3.82   | 3.82   |                                                            |
| yearly cost        | 17964  | 15969  |                                                            |
| 10-yr cost         | 179638 | 159691 |                                                            |
| inflated cost      | 227488 | 202228 | <-- these costs should be added to the fixed program costs |

**SECONDARY PREVENTION COSTS**

<-- includes: PHC and cardiology visits, treatments (abx etc), echo

see cost sheet part 4

|                     | listed cost | inflated cost | yearly | compliance weights     | 1986       | 1996       |
|---------------------|-------------|---------------|--------|------------------------|------------|------------|
| years 0-1 (2)       | 1379.5      | 1747          | 873.48 |                        |            | 0.93782383 |
| years 2-7 (6)       | 2301.96     | 2915          | 485.86 | regular 1              | 0.5        | 4          |
| years 8-19 (12)     | 2463.48     |               |        | irregular 0.5          | 5          | 6          |
| 8-19 yearly         | 205.29      |               | 259.98 | none 0                 | 5          | 0          |
| thus, years 8-9 (2) | 410.58      | 520           |        |                        |            |            |
| SUBTOTAL 10-yr      |             | 5182          |        | weighted prop tot cost | 0.68269230 | 0.96891191 |
|                     |             |               |        |                        | 8          | 7          |

|                  |      |
|------------------|------|
| 1986 avg pt cost | 3538 |
| 1996 avg pt cost | 5021 |

**ACUTE TREATMENT COSTS**

see cost sheet part 3

|                      | years 0-1 | years 2-7 | years 8-19 | 2-yr est | 10-yr total | inflated cost | yr 1 hosp | inflated cost |
|----------------------|-----------|-----------|------------|----------|-------------|---------------|-----------|---------------|
| pure ARF             | 1703.28   | 1005.96   | xxx        | 335.32   | 3044.56     | 3855.54       | 1023.78   | 1296.48       |
| ARF/carditis, no seq | 2009.2    | 1005.96   |            | 335.32   | 3350.48     | 4242.95       | 1329.70   | 1683.89       |
| light RHD            | 2809.2    | 2301.96   | 2463.48    | 410.58   | 5521.74     | 6992.57       | 1429.70   | 1810.53       |
| mod-severe RHD       | 3327.6    | 2301.96   | 2463.48    | 410.58   | 6040.14     | 7649.05       | 1948.10   | 2467.02       |
| mod-sev w/ HF        | 6802      | 3445.38   | 5422.32    | 903.72   | 11151.1     | 14121.42      | 5009.18   | 6343.48       |
| surgical cases no HF | 18362.88  | 2581.56   | 3946.68    | 657.78   | 21602.22    |               | 16694.18  | 21141.01      |
| surgical cases w/ HF | 18984.92  | 12126.6   |            |          | 24374.52    | 29111.78      | 16694.18  | 21141.01      |

(for surgery, weighted costs w/ and w/o HF 50-50)

| TOTAL COSTS (weighted 50-50) | w/ 2ppx 86 | w/ 2ppx 96 | recur hosp |
|------------------------------|------------|------------|------------|
| 1 - ARF                      | 4049       |            | 1490       |
| 2 - RHD mild/mod             | 7321       | 10859      | 2139       |
| 3 - RHD severe               | 14121      | 17659      | 6343       |
| 4 - RHD surgery              | 29112      |            |            |
